# Supplementary material for: Multifunctional Ni3S2@NF-based electrocatalysts for efficient and durable electrocatalytic water splitting
Source: Royal Society of Chemistry journal article supplement (doi:10.1039/d3dt02035e), 2023-01-01
Supplement: d3dt02035e1.pdf [file d3dt02035e1.pdf]

## Supporting Information

### **Multifunctional Ni<sub>3</sub>S<sub>2</sub>@NF-based Electrocatalysts for Efficient and Durability Electrocatalytic Water Splitting**

Xiaomei Xu<sup>a</sup>, Qiaoling Mo<sup>b</sup>, Kuangqi Zheng<sup>c</sup>, Zhaodi Xu<sup>b,\*</sup>, Hu Cai<sup>a,\*</sup>.

<sup>a</sup> School of Chemistry and Chemical Engineering, Nanchang University, 999 Xuefu Avenue, Nanchang 330031, China.

<sup>b</sup> Center of analysis and testing, Nanchang University, 235 Nanjing east road, Nanchang 330029, China.

<sup>c</sup> School of Future Technology, Nanchang University, 999 Xue fu Avenue, Nanchang 330031, China.

\*Corresponding authors:

xuzhaodi@ncu.edu.cn (Zhaodi Xu)

caihu@ncu.edu.cn (Hu Cai)

## Experimental Section

### 1. Chemicals and Materials

Cobaltous nitrate hexahydrate ( $\text{Co}(\text{NO}_3)_2 \cdot 6\text{H}_2\text{O}$ ), thiourea ( $\text{CH}_4\text{N}_2\text{S}$ ), sodium hydroxide ( $\text{NaOH}$ ), potassium hydroxide ( $\text{KOH}$ ), acetone ( $\text{C}_3\text{H}_6\text{O}$ ), hydrochloric acid ( $\text{HCl}$ , 36~38%) and ethanol ( $\text{CH}_3\text{CH}_2\text{OH}$ ,  $\geq 99.8\%$ ) were purchased by Xilong Science Co., Ltd. Nickel nitrate hexahydrate ( $\text{Ni}(\text{NO}_3)_2 \cdot 6\text{H}_2\text{O}$ ) was purchased by Tianjin Fengchuan Chemical Reagent Technology Co., Ltd. Cerium (Iii) Nitrate Hexahydrate ( $\text{CeH}_{12}\text{N}_3\text{O}_{15}$ ) was purchased by Aladdin Chemical Reagent Company. Every chemical reagent was analytical purity.

### 2. Synthesis of $\text{Ni}_3\text{S}_2@\text{NF}$

A pretreatment of Ni foam (2 cm $\times$ 3 cm) was cleaned by sonication in acetone, HCl solution (3 M), ethanol and water to remove oxides and external ions, respectively. The treated Ni foam was dried at 60 °C for 12 h under a vacuum oven. The  $\text{Ni}_3\text{S}_2@\text{NF}$  was prepared by a facile one-step hydrothermal method. In a typical process, 0.1 g thiourea was suspended in the mixture of water (25 mL) and ethanol (5 mL), and then the mixture was vigorously stirred for 30 min at room temperature. Subsequently, the nickel foam substrates were immersed and leaned against the wall of the autoclave and heated at 160 °C for 5 h. After the autoclave was cooled to room temperature naturally, the obtained  $\text{Ni}_3\text{S}_2$  in situ grown on Ni foam ( $\text{Ni}_3\text{S}_2@\text{NF}$ ) was cleaned by ethanol and deionized water several times and dried in a vacuum oven at 60 °C for 12 h.

### 3. Synthesis of $\text{Ni}_m\text{Co}_n\text{LDH}/\text{Ni}_3\text{S}_2@\text{NF}$ and $\text{Ni}_m\text{Co}_n\text{LDH-CeO}_x/\text{Ni}_3\text{S}_2@\text{NF}$

$\text{Ni}_m\text{Co}_n\text{LDH-CeO}_x/\text{Ni}_3\text{S}_2@\text{NF}$  with different mole ratio of Ni and Co were synthesized by hydrothermal method. Firstly, mixing m mole of  $\text{Ni}(\text{NO}_3)_2 \cdot 6\text{H}_2\text{O}$  (m=4, 2, 1), n mole of  $\text{Co}(\text{NO}_3)_3 \cdot 6\text{H}_2\text{O}$  (n=1, 2, 4), 0.5 mmol  $\text{Ce}(\text{NO}_3)_2 \cdot 6\text{H}_2\text{O}$  and 5 mmol hexamethylenetetramine (HMT) into 60 mL  $\text{H}_2\text{O}$  to form a homogenous solution. Secondly, the above homogenous solution and  $\text{Ni}_3\text{S}_2@\text{NF}$  were transferred into the autoclave and heated at 160 °C for 6 h. Thirdly, the autoclave was cooled naturally to room temperature, and the  $\text{Ni}_m\text{Co}_n\text{LDH-CeO}_x/\text{Ni}_3\text{S}_2@\text{NF}$  was

impregnated and rinsed with deionized water (DI) and dried overnight at 60 °C. Ni<sub>m</sub>Co<sub>n</sub> LDH/Ni<sub>3</sub>S<sub>2</sub>@NF was synthesized by the same method as utilized for Ni<sub>m</sub>Co<sub>n</sub> LDH-CeO<sub>x</sub>/Ni<sub>3</sub>S<sub>2</sub>@NF without adding Ce(NO<sub>3</sub>)<sub>2</sub>·6H<sub>2</sub>O. The average amount of Ni<sub>2</sub>Co<sub>1</sub> LDH-CeO<sub>x</sub>/Ni<sub>3</sub>S<sub>2</sub>@NF, Ni<sub>2</sub>Co<sub>1</sub> LDH/Ni<sub>3</sub>S<sub>2</sub>@NF and Ni<sub>3</sub>S<sub>2</sub>@NF are 1.88, 1.78 and 0.97 mg·cm<sup>-2</sup>, respectively.

#### 4. Characterization

Morphologies of the samples were probed using a HITACHI Regulus 8100 field emission scanning electron microscopy (FESEM) and JEM-2100F transmission electron microscopy (TEM). The powder X-ray diffractometer (XRD, Bruker, D8 advance, Cu Ka = 1.5406 Å, 40 kV and 40 mA) was applied to investigate the phase composition at a scan rate of 10 °·min<sup>-1</sup>. X-ray photoelectron spectroscopy (XPS, Thermo Fisher, ESCALAB 250Xi) was used to analyze the chemical state, and the binding energy of the elements was calibrated by 284.8 eV. Micro-Raman spectroscopy (Renishaw, INVIA03040430) and Infrared spectroscopy (Cary 630) were employed to analyze the functional groups of the samples.

#### 5. Electrochemical Measurements

All electrochemical tests were carried out on an electrochemical workstation (CS350M) in a three-electrode system, which used as-prepared samples as the working electrodes, carbon rod as the counter electrodes and Hg/HgO as the reference electrodes. All potentials used in this study were calibrated with the Reversible Hydrogen Electrode (RHE) with the following equation:  $E_{\text{RHE}} = E_{\text{SCE}} + 0.098 + 0.059 \text{ pH}$ , where  $E_{\text{RHE}}$  was the potential versus RHE, and  $E_{\text{SCE}}$  was the measured potential against the saturated Hg/HgO reference electrode. The overpotential ( $\eta$ ) was examined to a reversible hydrogen electrode ( $\eta = E_{\text{RHE}} - 1.23 \text{ V}$ ). All the above electrochemical curves were corrected with no  $iR$  compensation. Before the OER reaction, the 1.0 M KOH electrolyte was bubbled with N<sub>2</sub> for at least 20 min to remove O<sub>2</sub>. And the N<sub>2</sub> gas was purged into electrolytes before HER measurement to eliminate dissolved oxygen. The OER and HER polarization curves were recorded at a scan rate of 5.0 mV s<sup>-1</sup> in 1.0 M KOH electrolyte. The Tafel slopes were obtained by

analyzing the polarization curves at  $5.0 \text{ mV}\cdot\text{s}^{-1}$ . Electrochemical impedance spectroscopy (EIS) was carried out at  $-1.20 \text{ V vs. RHE}$  and  $1.24 \text{ V vs. RHE}$  with a frequency range from  $100 \text{ kHz}$  to  $0.01 \text{ Hz}$ . The durability of the  $\text{Ni}_2\text{Co}_1 \text{ LDH-CeO}_x/\text{Ni}_3\text{S}_2@\text{NF}$  was evaluated by performing a long-term controlled potential electrolysis at  $100 \text{ mA}$  for  $50 \text{ h}$  and a galvanostatic method at the current density of  $100 \text{ mA}\cdot\text{cm}^{-2}$  in  $1.0 \text{ M KOH}$  electrolyte. Cyclic voltammetry (CV) curves were tested at different scan rates in the non-faradic potentials region of  $0.391\text{-}0.491 \text{ V vs. RHE}$  and  $-0.05\text{-}0.05 \text{ V vs. RHE}$  to determine the double-layer capacitance ( $C_{dl}$ ) values, which was analyzing the slope of the linear fit by changing the different scan rate and then observe the corresponding current.<sup>1</sup>The electrochemical surface area (ECSA) was estimated according to the following equation:  $\text{ECSA} = C_{dl}/C_S$ , where  $C_S$  is the ideal specific capacitance of the sample ( $C_S = 0.040 \text{ mF}\cdot\text{cm}^{-2}$ ).<sup>2</sup>

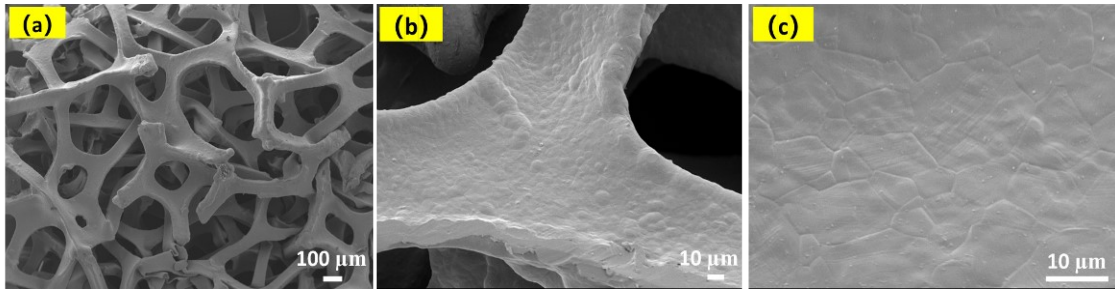

Figure S1. (a-c) SEM images of pure NF at different magnifications.

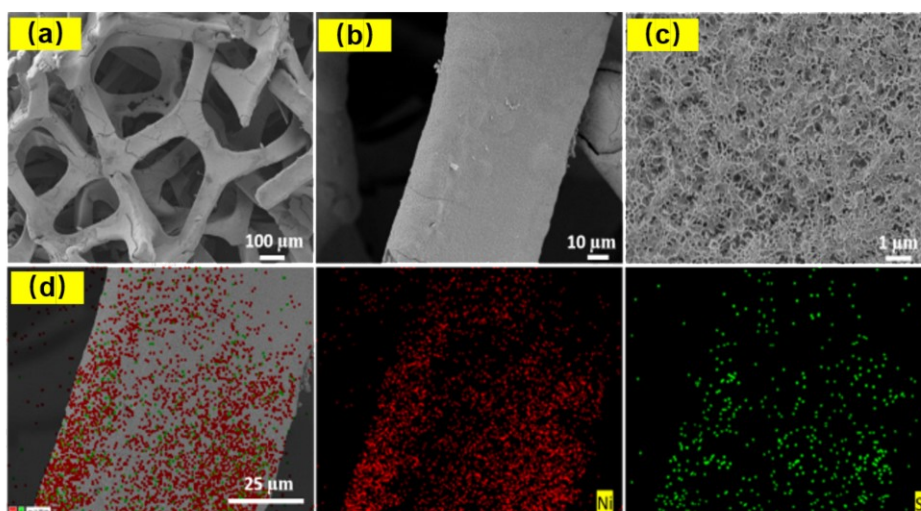

Figure S2. (a-c) SEM images of Ni<sub>3</sub>S<sub>2</sub>/NF at different magnifications, (d) SEM images of Ni<sub>3</sub>S<sub>2</sub>/NF with corresponding Ni and S elemental mapping.

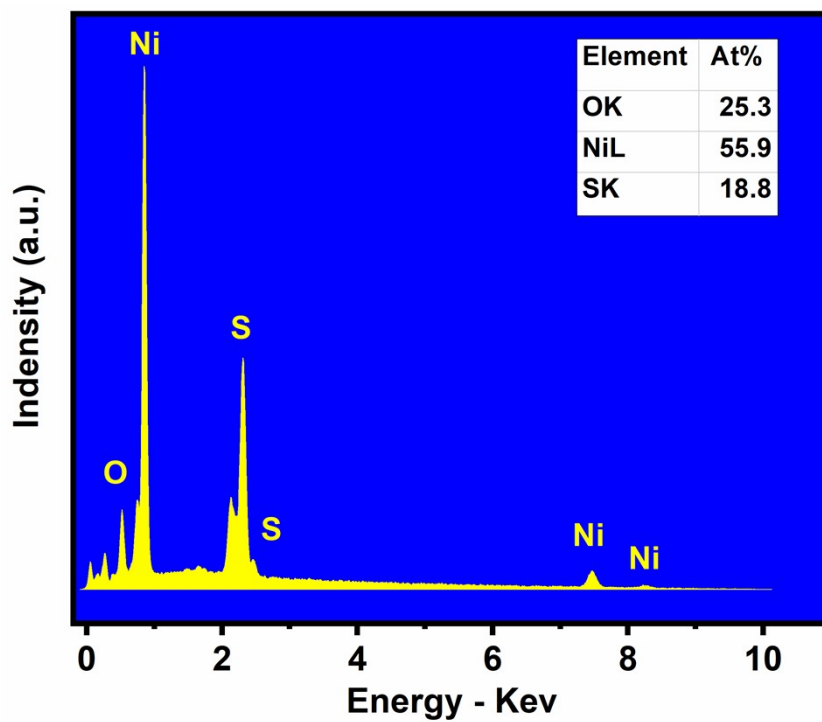

Figure S3. EDS image of Ni<sub>3</sub>S<sub>2</sub>@NF.

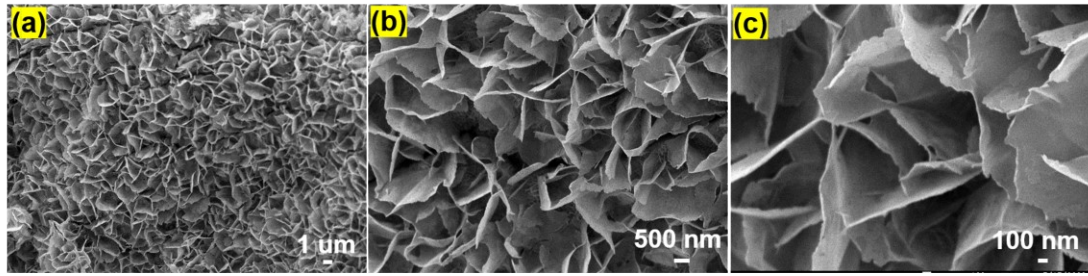

Figure S4. SEM images of  $\text{Ni}_2\text{Co}_1 \text{LDH}/\text{Ni}_3\text{S}_2@\text{NF}$  at different magnifications.



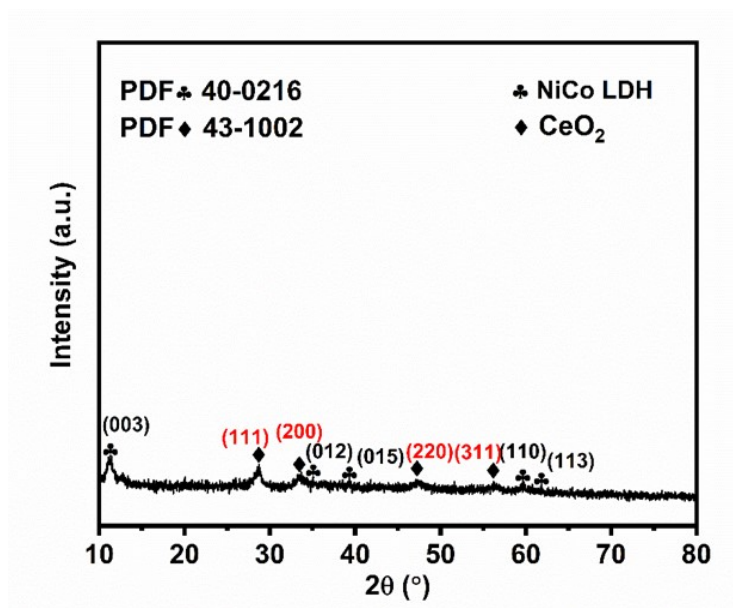

Figure S5. XRD patterns of the  $\text{Ni}_2\text{Co}_1\text{LDH-CeO}_x$  grown on the carbon cloth substrate.

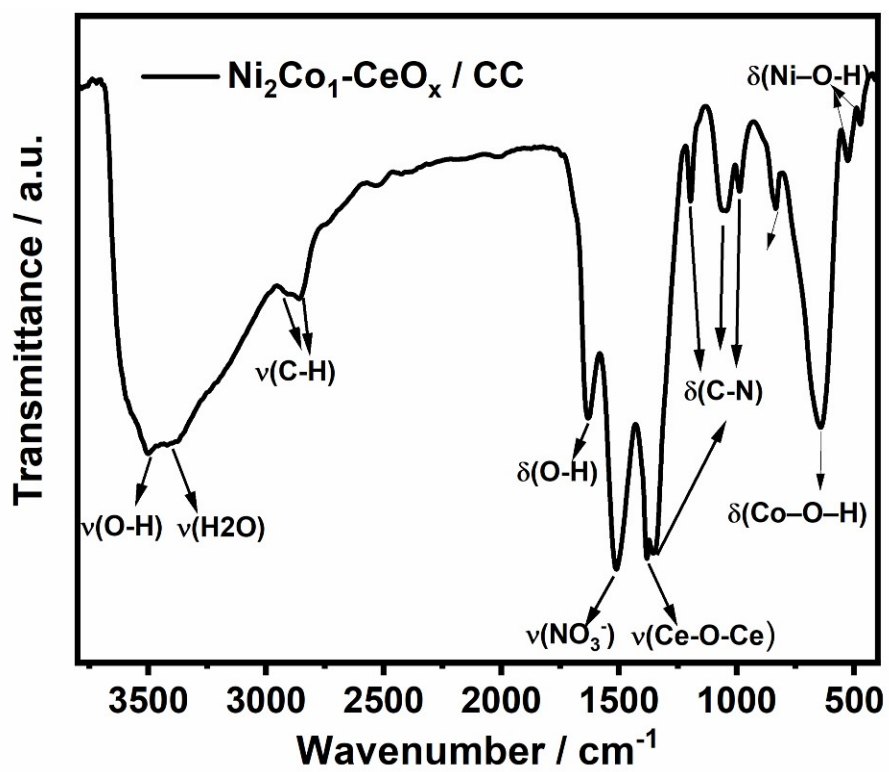

Figure S6. FT-IR spectra of  $\text{Ni}_2\text{Co}_1$  LDH- $\text{CeO}_x/\text{CC}$  sample.

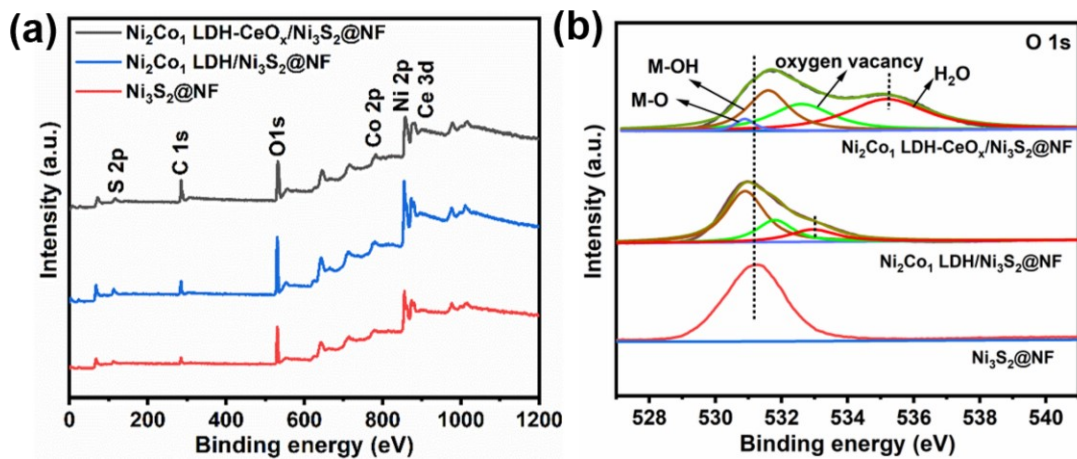

Figure S7. (a) The survey XPS spectra of  $\text{Ni}_2\text{Co}_1\text{ LDH-CeO}_x/\text{Ni}_3\text{S}_2@\text{NF}$ ,  $\text{Ni}_2\text{Co}_1\text{ LDH}/\text{Ni}_3\text{S}_2@\text{NF}$ , and  $\text{Ni}_3\text{S}_2@\text{NF}$ . (b) High-resolution XPS spectra of O 1s of  $\text{Ni}_2\text{Co}_1\text{ LDH-CeO}_x/\text{Ni}_3\text{S}_2@\text{NF}$ ,  $\text{Ni}_2\text{Co}_1\text{ LDH}/\text{Ni}_3\text{S}_2@\text{NF}$  and  $\text{Ni}_3\text{S}_2@\text{NF}$ .

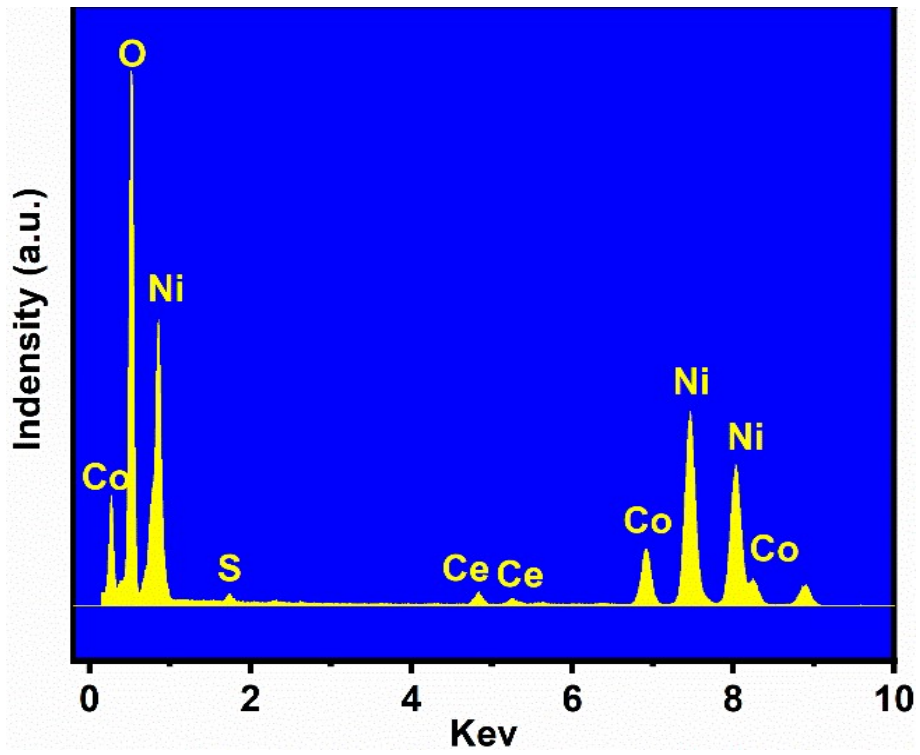

Figure S8. EDS image of  $\text{Ni}_2\text{Co}_1$  LDH- $\text{CeO}_x/\text{Ni}_3\text{S}_2@NF$ .

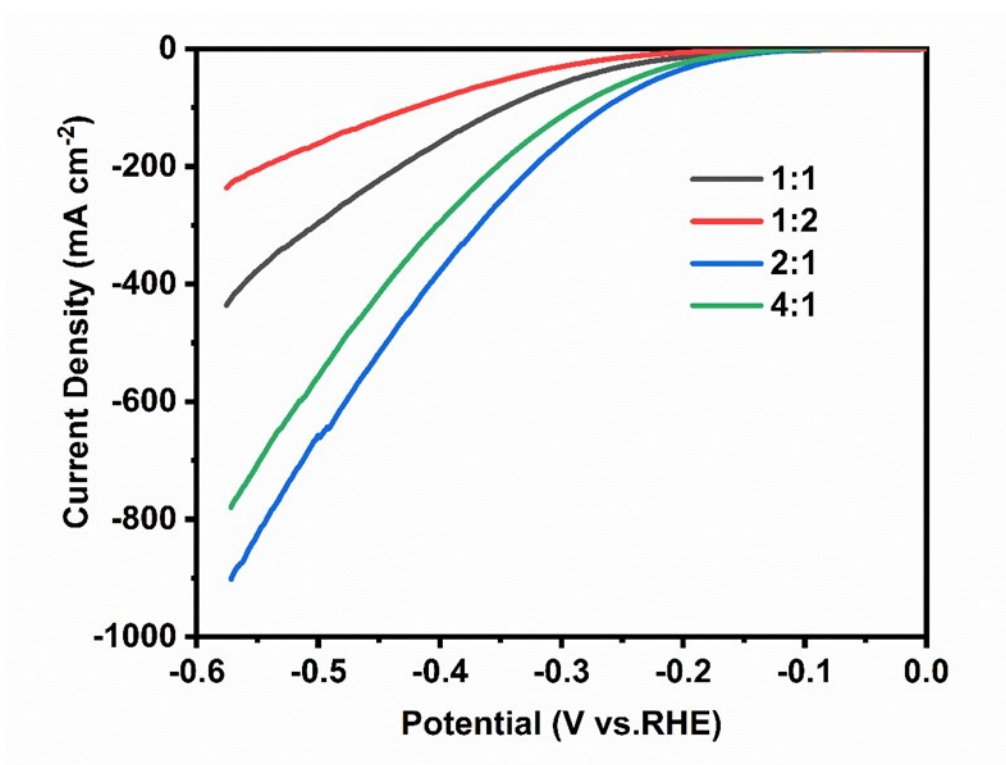

Figure S9. LSV curves of Ni<sub>m</sub>Co<sub>n</sub> LDH-CeO<sub>x</sub>/Ni<sub>3</sub>S<sub>2</sub>@NF prepared at different Ni/Co feeding ratios for HER in 1 M KOH.

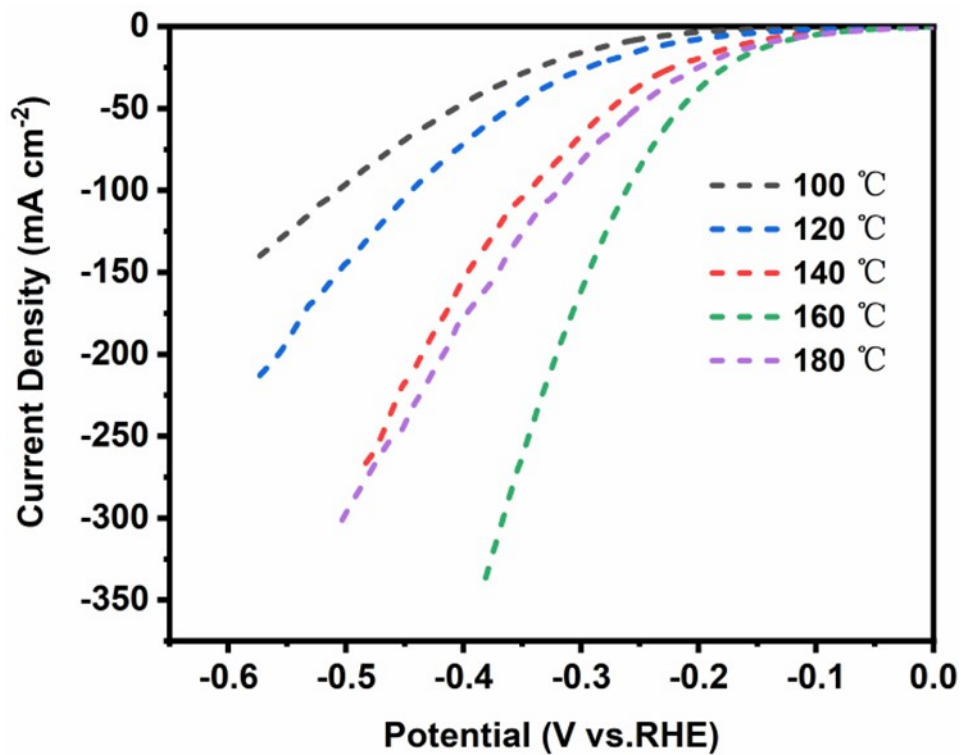

Figure S10. Catalytic activities of  $\text{Ni}_2\text{Co}_1\text{LDH-CeO}_x/\text{Ni}_3\text{S}_2@\text{NF}$  prepared at different hydrothermal temperatures (100-180°C) in 1 M KOH.

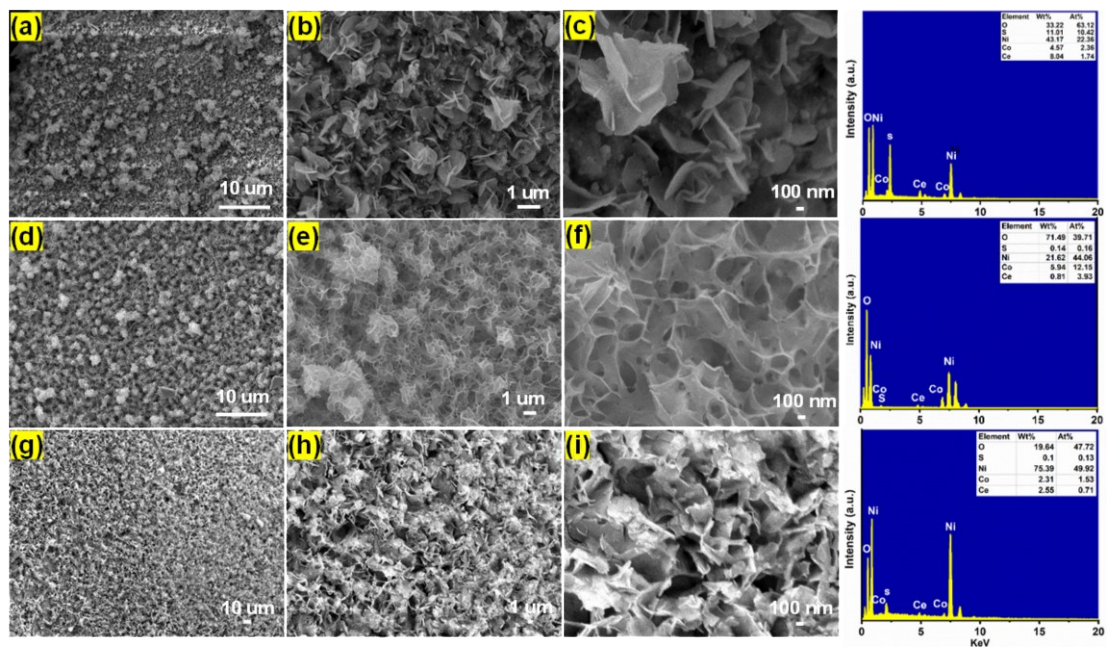

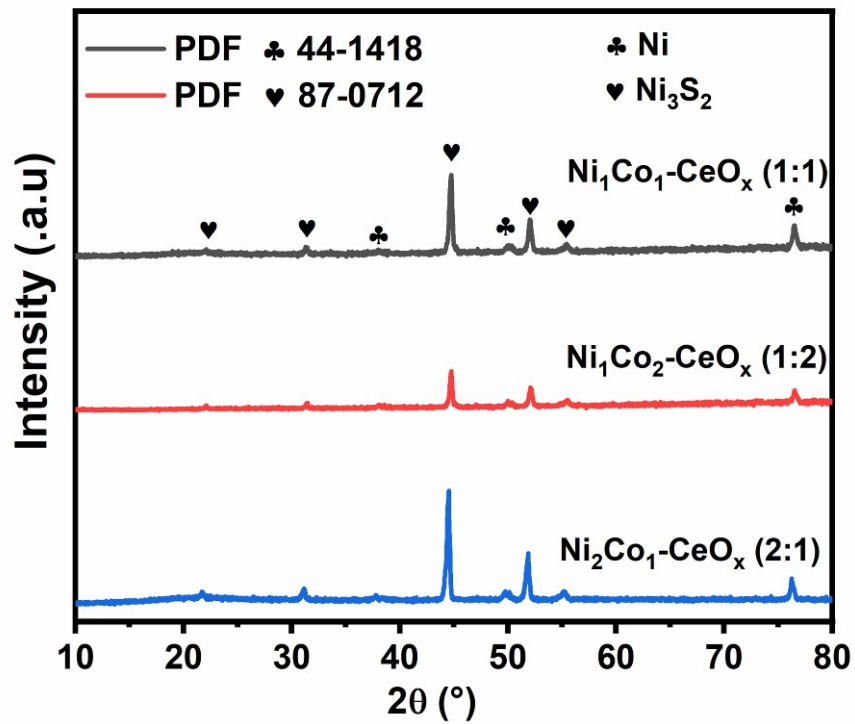

Figure S12. XRD patterns of  $\text{Ni}_m\text{Co}_n$  LDH- $\text{CeO}_x/\text{Ni}_3\text{S}_2@\text{NF}$  with different molar ratios (Ni and Co).



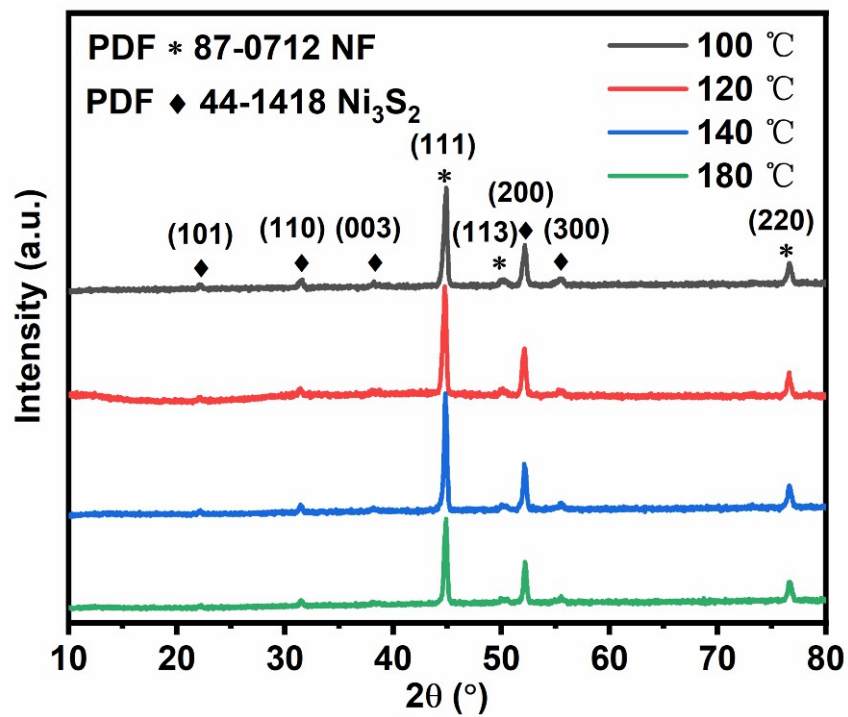

Figure S13. XRD patterns of Ni<sub>2</sub>Co<sub>1</sub> LDH-CeO<sub>x</sub>/Ni<sub>3</sub>S<sub>2</sub>@NF at different hydrothermal temperatures (100-180 °C).

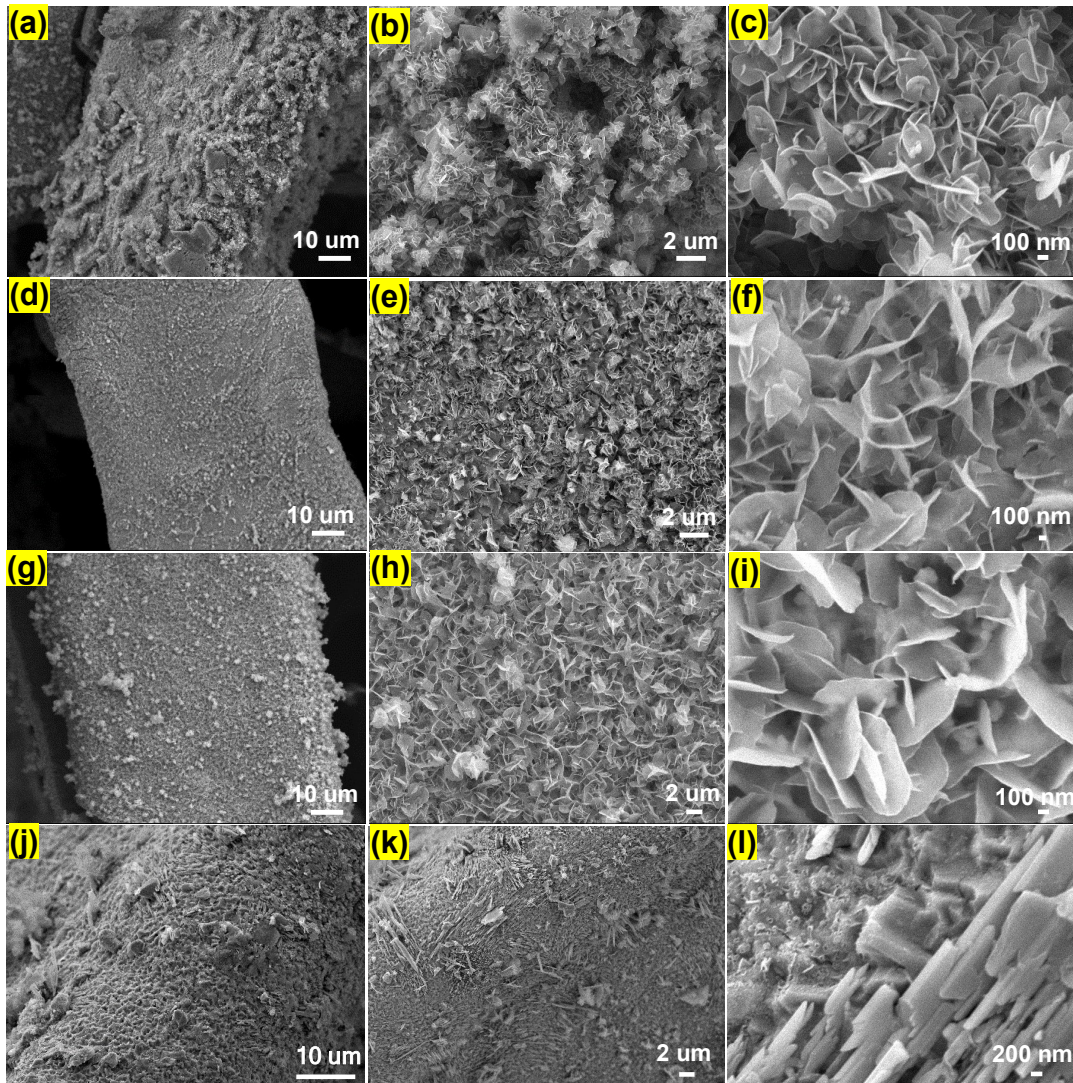

Figure S14. SEM images of  $\text{Ni}_2\text{Co}_1 \text{LDH-CeO}_x/\text{Ni}_3\text{S}_2@\text{NF}$  at (a-c) 100°C, (d-f) 120°C, (g-i) 140°C, and (j-l) 180°C hydrothermal temperature.

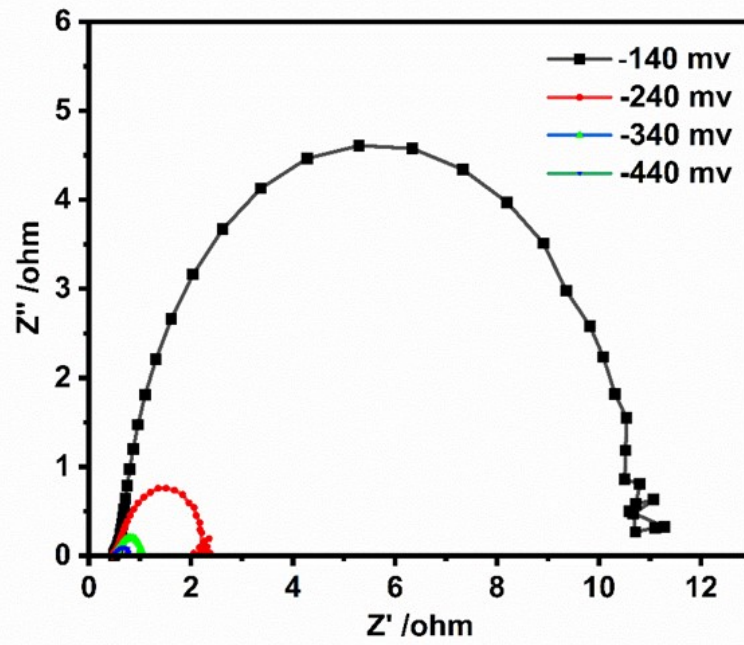

Figure S15. Electrochemical impedance spectra (EIS) of the  $\text{Ni}_2\text{Co}_1$  LDH- $\text{CeO}_x/\text{Ni}_3\text{S}_2@NF$  electrode measured with overpotentials from -140 to -440 mV.

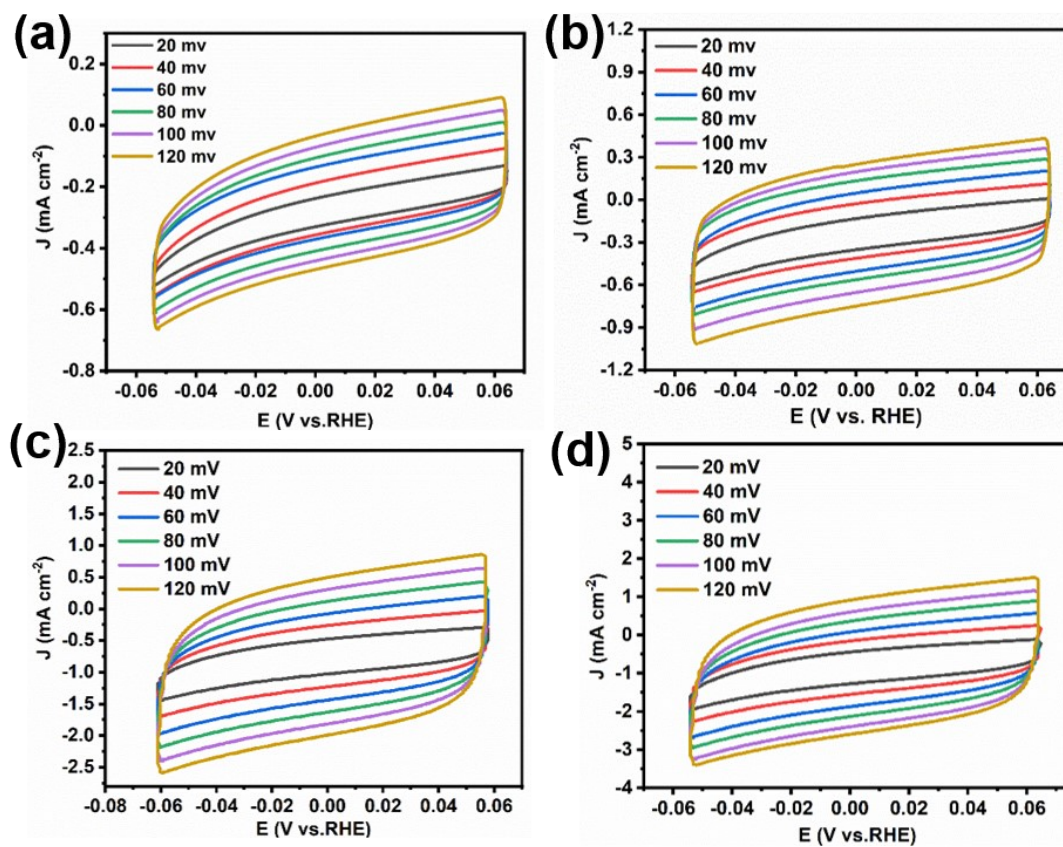

Figure S16. CV curves of (a) NF, (b) Ni<sub>3</sub>S<sub>2</sub>@NF, (c) Ni<sub>2</sub>Co<sub>1</sub> LDH/Ni<sub>3</sub>S<sub>2</sub>@NF, (d) Ni<sub>2</sub>Co<sub>1</sub> LDH-CeO<sub>x</sub>/Ni<sub>3</sub>S<sub>2</sub>@NF in the non-Faradaic capacitance at varying scan rates (20-120 mV·s<sup>-1</sup>) in 1 M KOH.

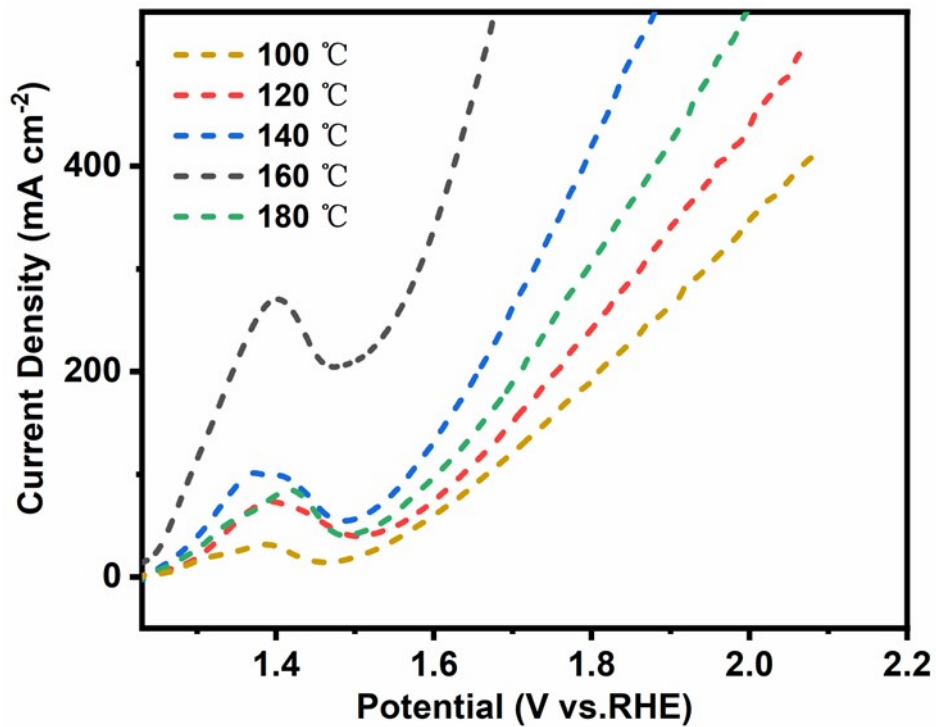

Figure S17. Catalytic activities of Ni<sub>2</sub>Co<sub>1</sub> LDH-CeO<sub>x</sub>/Ni<sub>3</sub>S<sub>2</sub>@NF at different hydrothermal temperatures (100-180 °C) in 1 M KOH.

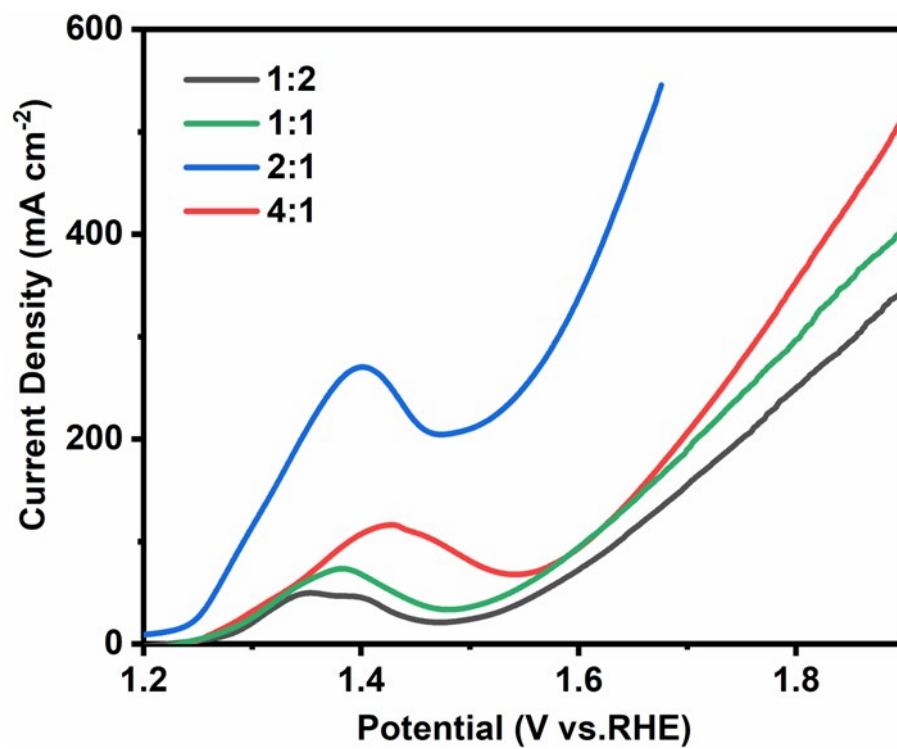

Figure S18. LSV curves of Ni<sub>m</sub>Co<sub>n</sub> LDH-CeO<sub>x</sub>/Ni<sub>3</sub>S<sub>2</sub>@NF at different Ni/Co ratios for OER in 1 M KOH.

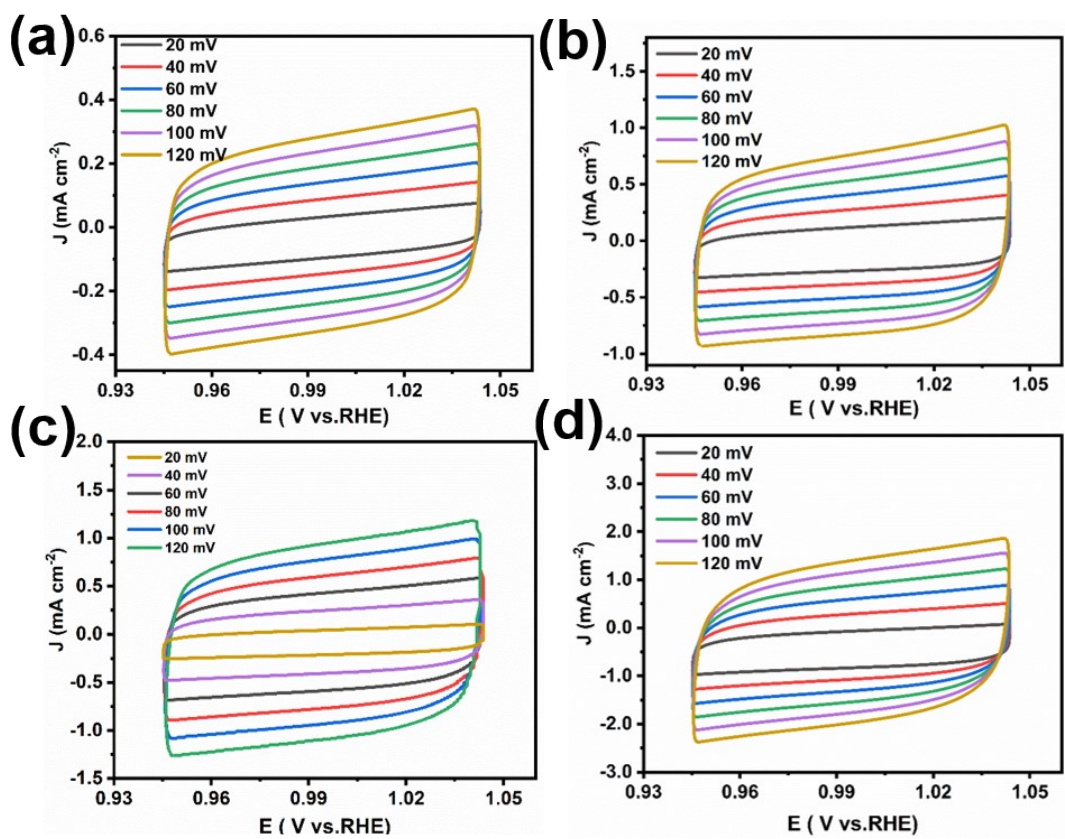

Figure S19. CV curves of (a) NF, (b) Ni<sub>3</sub>S<sub>2</sub>@NF, (c) Ni<sub>2</sub>Co<sub>1</sub> LDH/Ni<sub>3</sub>S<sub>2</sub>@NF, (d) Ni<sub>2</sub>Co<sub>1</sub> LDH-CeO<sub>x</sub>/Ni<sub>3</sub>S<sub>2</sub>@NF in the non-Faradaic capacitance at varying scan rates (20-120 mV·s<sup>-1</sup>) in 1 M KOH.

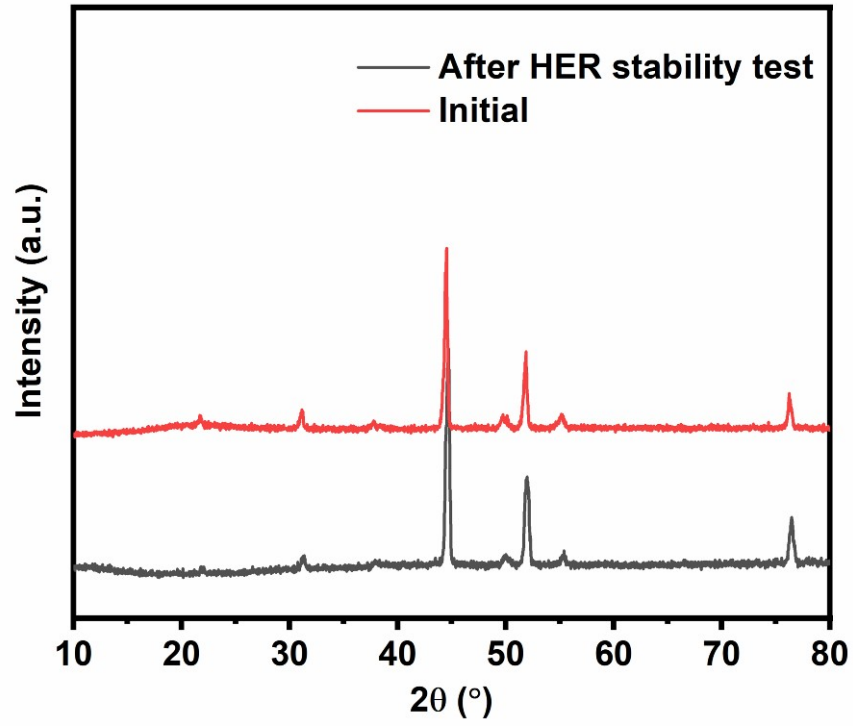

Figure S20. XRD pattern of  $\text{Ni}_2\text{Co}_1 \text{LDH-CeO}_x/\text{Ni}_3\text{S}_2@\text{NF}$  before and after 50 h HER stability test.



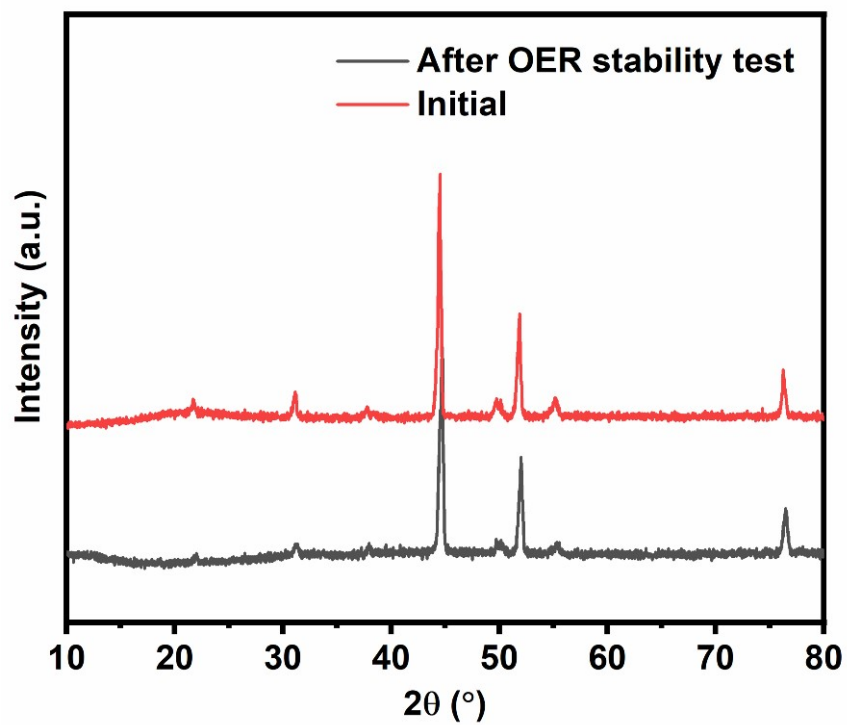

Figure S21. XRD pattern of  $\text{Ni}_2\text{Co}_1\text{LDH-CeO}_x/\text{Ni}_3\text{S}_2@\text{NF}$  before and after 50 h OER stability test.

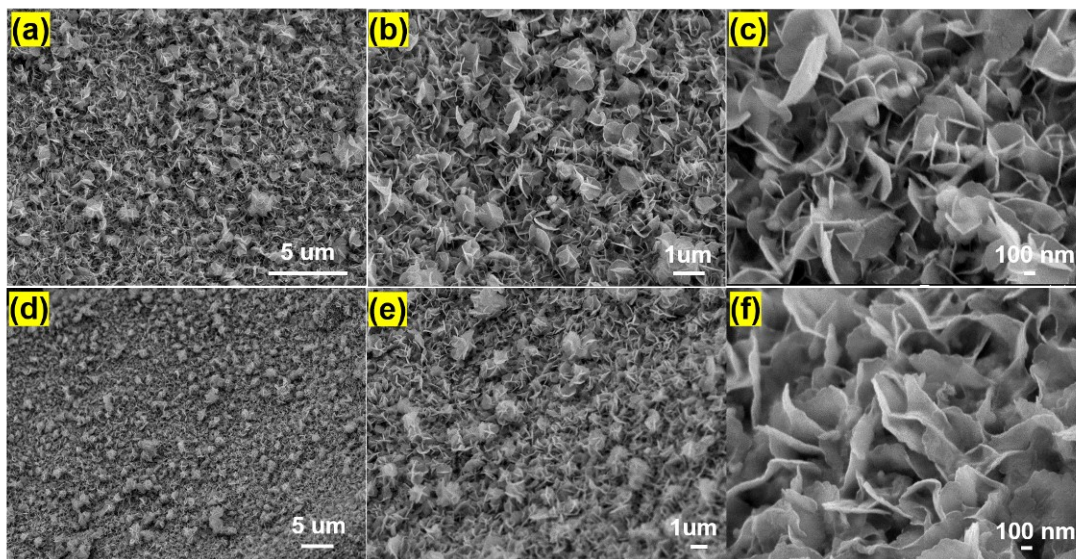

Figure S22. SEM images of  $\text{Ni}_2\text{Co}_1\text{LDH-CeO}_x/\text{Ni}_3\text{S}_2@\text{NF}$  after (a-c) HER and (d-f) OER stability test at different magnifications.

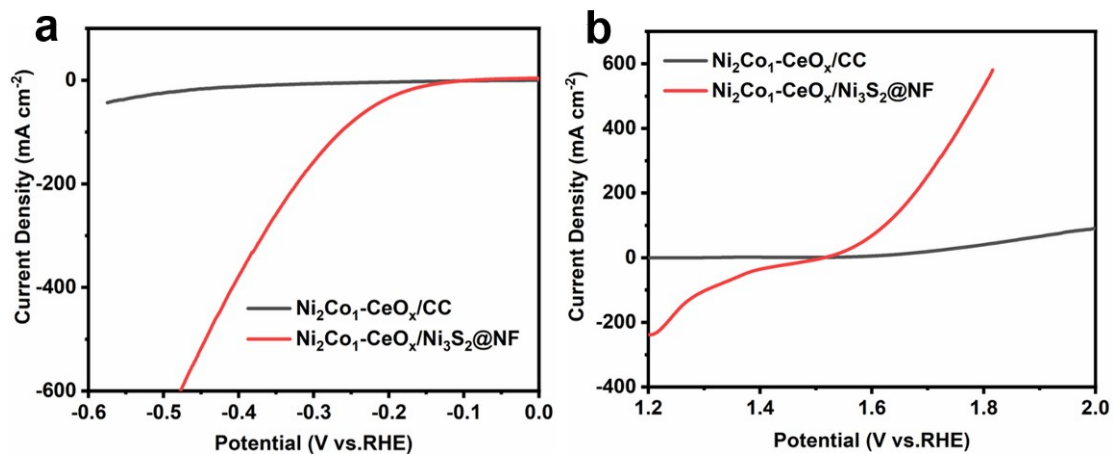

Figure S23. LSV curves of the Ni<sub>2</sub>Co<sub>1</sub> LDH-CeO<sub>x</sub>@CC and Ni<sub>2</sub>Co<sub>1</sub> LDH-CeO<sub>x</sub>/Ni<sub>3</sub>S<sub>2</sub>@CC for (a) HER and (b) OER in 1 M KOH solution.

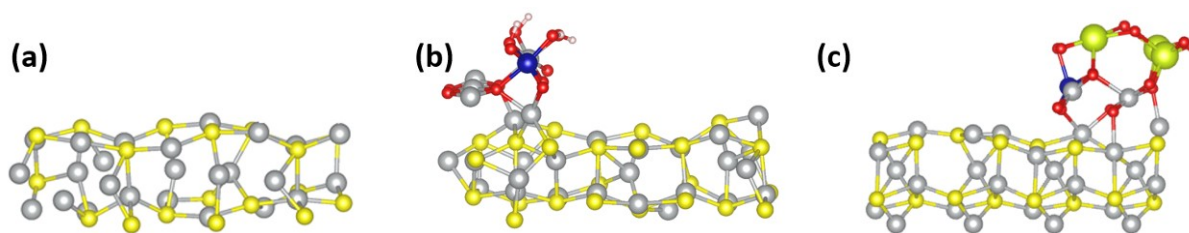

Figure S24. Computational models for (a)  $\text{Ni}_3\text{S}_2$  (110), (b)  $\text{Ni}_2\text{Co}_1$  LDH/ $\text{Ni}_3\text{S}_2$ @NF and (c)  $\text{Ni}_2\text{Co}_1$  LDH- $\text{CeO}_x$ / $\text{Ni}_3\text{S}_2$ @NF. The grey, yellow, green, red, blue, and white balls represent Ni, S, Ce, O, Co, and H atoms, respectively.

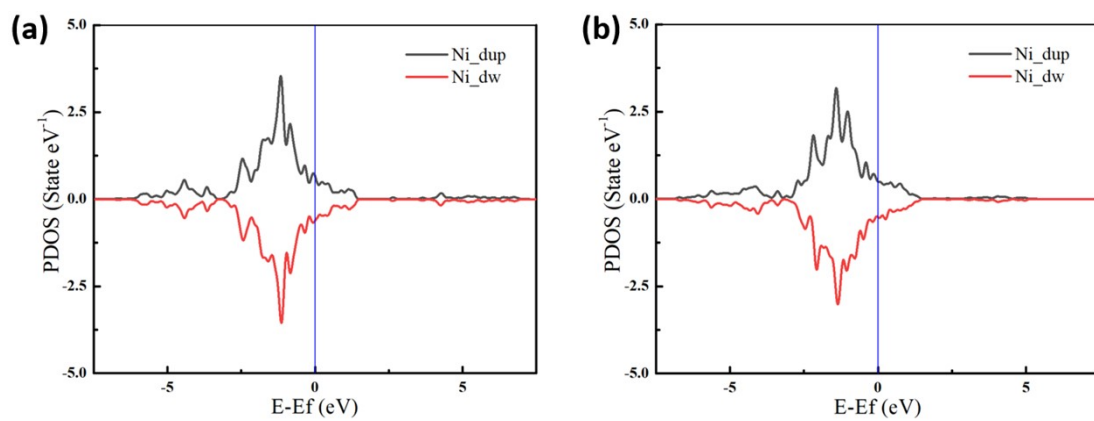

Figure S25. Calculated DOS profiles for single surface Ni on (a)  $\text{Ni}_2\text{Co}_1$  LDH/ $\text{Ni}_3\text{S}_2$ @NF and (b)  $\text{Ni}_2\text{Co}_1$  LDH- $\text{CeO}_x$ / $\text{Ni}_3\text{S}_2$ @NF.

Table S1. Comparison of the activity of HER and OER with the as-reported transition metal-based sulfide electrocatalysts for water splitting in 1 M KOH.

| Electrocatalysts                                                                      | $\eta$ for HER @corresponding j<br>(mV@mA cm <sup>-2</sup> ) | $\eta$ for OER @corresponding j<br>(mV@mA cm <sup>-2</sup> ) | stability of water splitting<br>(V or mA cm <sup>-2</sup> @h) | Scan rate<br>(mVs <sup>-1</sup> ) | Ref.             |
|---------------------------------------------------------------------------------------|--------------------------------------------------------------|--------------------------------------------------------------|---------------------------------------------------------------|-----------------------------------|------------------|
| <b>Ni<sub>2</sub>Co<sub>1</sub>LDH-CeO<sub>x</sub>/Ni<sub>3</sub>S<sub>2</sub>@NF</b> | <b>265@100</b>                                               | <b>310@100</b>                                               | <b>100 mA cm<sup>-2</sup>@50</b>                              | <b>5</b>                          | <b>This work</b> |
| Ni <sub>3</sub> S <sub>2</sub> @G@Co <sub>9</sub> S <sub>8</sub>                      | NA                                                           | 350@100                                                      | 100 mA cm <sup>-2</sup> @50                                   | 5                                 | [3]              |
| Ni <sub>3</sub> S <sub>2</sub> /Cu-NiCo@NF                                            | 304@100                                                      | 218@100                                                      | 100 mA cm <sup>-2</sup> @12                                   | 5                                 | [4]              |
| Ni-Ni <sub>3</sub> S <sub>2</sub>                                                     | 57@10                                                        | 295@20                                                       | 10 mA cm <sup>-2</sup> @30                                    | 5                                 | [5]              |
| Ni(OH) <sub>2</sub> /Ni <sub>3</sub> S <sub>2</sub> /NF                               | 319@100                                                      | 185@100                                                      | 100 mA cm <sup>-2</sup> @100                                  | 5                                 | [6]              |
| Co <sub>3</sub> O <sub>4</sub> @Ni <sub>3</sub> S <sub>2</sub> /NF                    | NA                                                           | 260@20                                                       | 10 mA cm <sup>-2</sup> @12                                    | 5                                 | [7]              |
| CoS <sub>x</sub> /Ni <sub>3</sub> S <sub>2</sub> @NF                                  | 204@10                                                       | 280@20                                                       | 370mV@10                                                      | 5                                 | [8]              |
| CoNi LDH-Ni <sub>3</sub> S <sub>2</sub> /NF                                           | 193@100                                                      | 382@100                                                      | 10 mA cm <sup>-2</sup> @22                                    | 5                                 | [9]              |
| Co(OH) <sub>2</sub> /Ni(OH) <sub>2</sub>                                              | NA                                                           | 270@20                                                       | 20 mA cm <sup>-2</sup> @24                                    | 5                                 | [10]             |
| Ce-NiCo-LDHs                                                                          | 134@50                                                       | 250@50                                                       | 17 mA cm <sup>-2</sup> @48                                    | 5                                 | [11]             |
| CoS/NiS/NF                                                                            | 210@10                                                       | 145@10                                                       | 10mA cm <sup>-2</sup> @10                                     | 5                                 | [12]             |
| CoS NF/CC                                                                             | 247@50                                                       | 310@10                                                       | 100 mA cm <sup>-2</sup> @20                                   | 5                                 | [13]             |
| Ni <sub>3</sub> S <sub>2</sub> -CoMoS <sub>x</sub> /NF                                | 234@10                                                       | 90@10                                                        | 10 mA cm <sup>-2</sup> @65                                    | 5                                 | [14]             |
| Ni <sub>3</sub> S <sub>2</sub> @NGCLS/NF                                              | 134@10                                                       | 271@10                                                       | 10 mA cm <sup>-2</sup> @40                                    | 5                                 | [15]             |
| NF-Ni <sub>3</sub> S <sub>2</sub> /MnO <sub>2</sub>                                   | 102@10                                                       | 260@10                                                       | 100 mA cm <sup>-2</sup> @36                                   | 5                                 | [16]             |
| CoNi-OH S@NF                                                                          | 167@10                                                       | 270@10                                                       | 50 mA cm <sup>-2</sup> @12                                    | 5                                 | [17]             |
| MnCo@NiS                                                                              | NA                                                           | 286@10                                                       | 50 mA cm <sup>-2</sup> @20                                    | 5                                 | [18]             |
| NiS <sub>2</sub> NWs/CFP                                                              | 165@10                                                       | 246@10                                                       | 30 mA cm <sup>-2</sup> @20                                    | 5                                 | [19]             |

**Table S2** Calculated free energy G for OER intermediate states (OH\*, O\*, OOH\*) with an applied potential U=0 V, in unit of eV. Clean catalyst has been shown as \*.

| Reaction step                                                      | Ni <sub>2</sub> Co <sub>1</sub><br>LDH/Ni <sub>3</sub> S <sub>2</sub> @NF | Ni <sub>2</sub> Co <sub>1</sub> LDH-<br>CeO <sub>x</sub> /Ni <sub>3</sub> S <sub>2</sub> @NF |
|--------------------------------------------------------------------|---------------------------------------------------------------------------|----------------------------------------------------------------------------------------------|
| * + H <sub>2</sub> O → OH* + (H <sup>+</sup> + e <sup>-</sup> )    | 1.80                                                                      | 1.64                                                                                         |
| OH* → O* + (H <sup>+</sup> + e <sup>-</sup> )                      | 2.74                                                                      | 2.13                                                                                         |
| O* + H <sub>2</sub> O → OOH* + (H <sup>+</sup> + e <sup>-</sup> )  | 3.78                                                                      | 3.56                                                                                         |
| OOH* → O <sub>2</sub> (g) + * + (H <sup>+</sup> + e <sup>-</sup> ) | 4.92                                                                      | 4.92                                                                                         |

**Table S3** Calculated free energy change  $\Delta G$  for OER intermediate states ( $\text{OH}^*$ ,  $\text{O}^*$ ,  $\text{OOH}^*$ ) with an applied potential  $U=1.23$  V, in unit of eV.

| Reaction step                                                                          | $\text{Ni}_2\text{Co}_1$<br>LDH/ $\text{Ni}_3\text{S}_2$ @NF | $\text{Ni}_2\text{Co}_1$ LDH-<br>$\text{CeO}_x$ / $\text{Ni}_3\text{S}_2$ @NF |
|----------------------------------------------------------------------------------------|--------------------------------------------------------------|-------------------------------------------------------------------------------|
| $* + \text{H}_2\text{O} \rightarrow \text{OH}^* + (\text{H}^+ + \text{e}^-)$           | 0.57                                                         | 0.41                                                                          |
| $\text{OH}^* \rightarrow \text{O}^* + (\text{H}^+ + \text{e}^-)$                       | 0.28                                                         | -0.33                                                                         |
| $\text{O}^* + \text{H}_2\text{O} \rightarrow \text{OOH}^* + (\text{H}^+ + \text{e}^-)$ | 0.09                                                         | -0.13                                                                         |
| $\text{OOH}^* \rightarrow \text{O}_2(\text{g}) + * + (\text{H}^+ + \text{e}^-)$        | 0                                                            | 0                                                                             |



## Reference

- [1] Y. Zhu, W. Zhou, Y. Chen, J. Yu, M. Liu, Z. Shao, *Adv. Mater.*, 2015, **27**, 7150-7155.
- [2] C. McCrory, S. Jung, J. Peters, T. Jaramillo, *J. Am. Chem. Soc.*, 2013, **135**, 6977-16987.
- [3] Q. Dong, Y. Zhang, Z. Dai, P. Wang, M. Zhao, J. Shao, W. Huang, X. Dong, *Nano Research*, 2018, **11**, 1389-1398.
- [4] L. Jia, G. Du, D. Han, Y. Hao, W. Zhao, Y. Fan, Q. Su, S. Ding, B. Xu, *J. Mater. Chem. A*, 2021, **9**, 27639-27650.
- [5] L. Jia, G. Du, D. Han, Y. Hao, W. Zhao, Y. Fan, Q. Su, S. Ding, B. Xu, *Advanced Energy and Sustainability Research*, 2021, **2**, 2100078.
- [6] J. Li, L. Jiang, S. He, L. Wei, R.-F. Zhou, J. Zhang, D.S. Yuan, S. Jiang, *Energy Fuel.*, 2019, **33**, 12052-12062.
- [7] Y. Gong, Z. Xu, H. Pan, Y. Lin, Z. Yang, X. Du, *J. Mater. Chem. A*, 2018, **6**, 5098-5106.
- [8] S. Shit, S. Chhetri, W. Jang, N.C. Murmu, H. Koo, P. Samanta, T. Kuila, *ACS Appl. Mater. Interfaces* 2018, **10**, 27712-27722.
- [9] Y. Liu, Y. Zhao, Y. Zhang, S. Xing, *Electroanal.* 2023, **35**, e202200251.
- [10] L.-F. Gu, C.-F. Li, J.-W. Zhao, L.-J. Xie, J.-Q. Wu, Q. Ren, G.-R. Li, *J. Mater. Chem. A*, 2021, **9**, 13279-13287.
- [11] H. N. Dhandapani, D. Mahendiran, A. Karmakar, P. Devi, S. Nagappan, R. Madhu, K. Bera, P. Murugan, B.R. Babu, S. Kundu, *J. Mater. Chem. A*, 2022, **10**, 17488-17500.
- [12] R. Guo, S. Zhang, H. Wen, Z. Ni, Y. He, T. Yu, J. You, *New J. Chem.*, 2021, **45**, 1887-1892.
- [13] Y. Li, X. Fu, W. Zhu, J. Gong, J. Sun, D. Zhang, J. Wang, *Inorg. Chem. Front.*, 2019, **6**, 2090-2095.
- [14] L. Zhao, H. Ge, G. Zhang, F. Wang, G. Li, *Electrochim. Acta*, 2021, **387**, 138538.
- [15] B. Li, Z. Li, Q. Pang, J.Z. Zhang, *Chemi. Eng. J.*, 2020, **401**, 126045.
- [16] Y. Xiong, L. Xu, C. Jin, Q. Sun, *Appl. Catal. B: Environ.*, 2019, **254**, 329-338.
- [17] Y. Yan, K. Bao, T. Liu, J. Cao, J. Feng, J. Qi, *Chemi. Eng. J.* 2020, **401**, 126092.
- [18] X. Wang, L. Li, L. Xu, Z. Wang, Z. Wu, Z. Liu, P. Yang, *J. Power Sources*, 2021, **489**, 229525.
- [19] Y. Guo, D. Guo, F. Ye, K. Wang, Z. Shi, *Int. J. Hydrogen Energy*, 2017, **42**, 17038-17048.
